# Supplementary material for: Constructing electron transfer pathways and active centers over W18O49 nanowires by doping Fe3+ and incorporating g-C3N5 for enhanced photocatalytic nitrogen fixation
Source: Royal Society of Chemistry journal article supplement (doi:10.1039/d1qi00503k), 2021-01-01
Supplement: d1qi00503k1.pdf [file d1qi00503k1.pdf]

## Supplementary information

**Constructing electron transfer pathways and active centers over  $W_{18}O_{49}$  nanowires by doping  $Fe^{3+}$  and incorporating with g- $C_3N_5$  for enhanced photocatalytic nitrogen fixation**

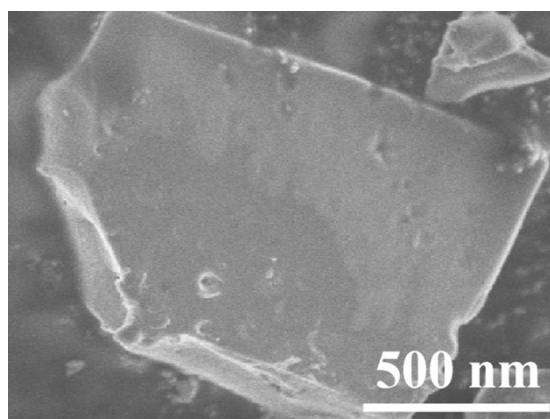

**Fig. S1** SEM image of bulk g- $C_3N_5$ .

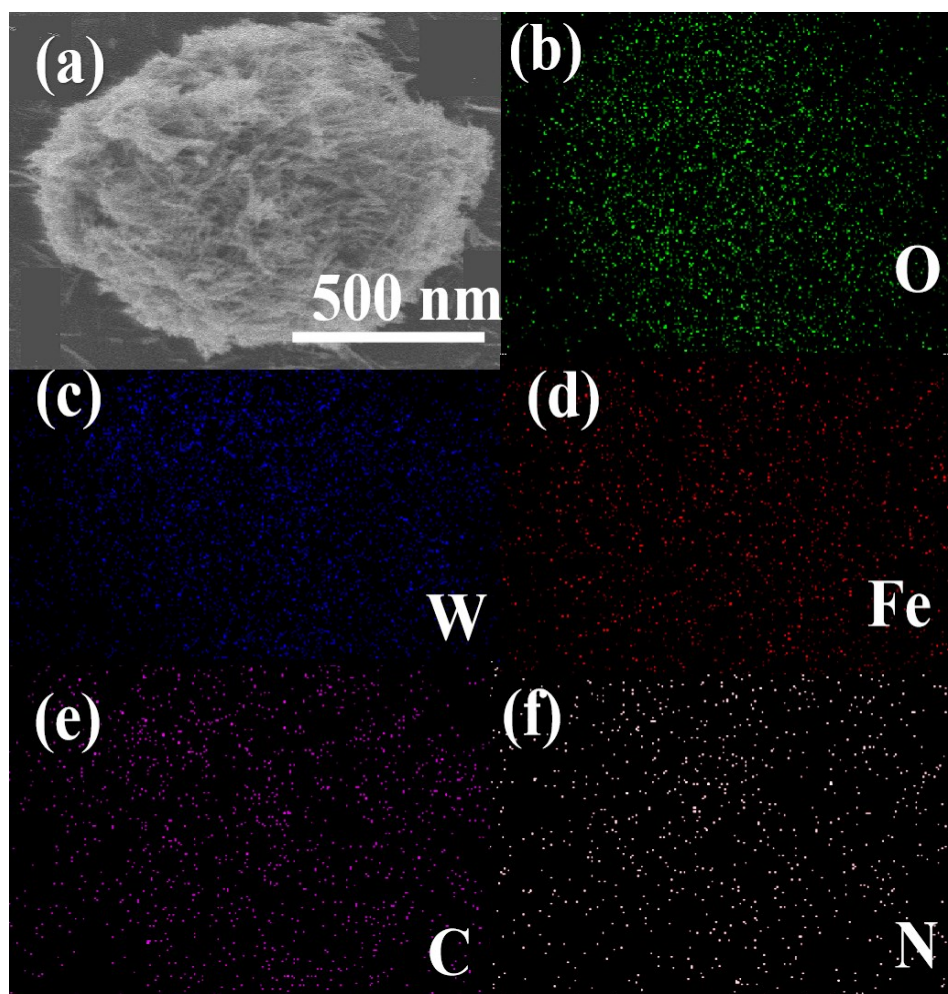

**Fig. S2** (a) SEM images of Fe-W<sub>18</sub>O<sub>49</sub>/g-C<sub>3</sub>N<sub>5</sub>; (b)-(f) EDS mapping of Fe-W<sub>18</sub>O<sub>49</sub>/g-C<sub>3</sub>N<sub>5</sub>.

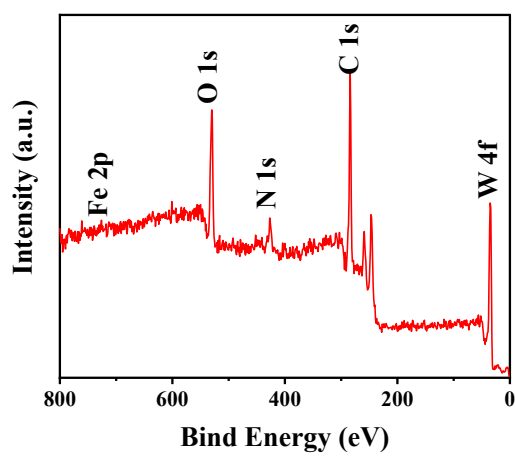

**Fig. S3** XPS survey spectra of Fe-W<sub>18</sub>O<sub>49</sub>/g-C<sub>3</sub>N<sub>5</sub>.

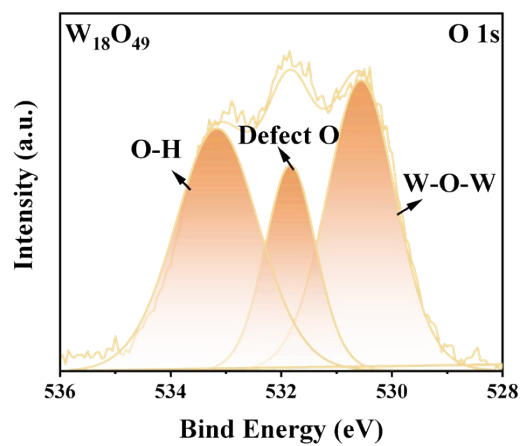

Fig. S4 High resolution XPS spectra for O 1s of W<sub>18</sub>O<sub>49</sub>.

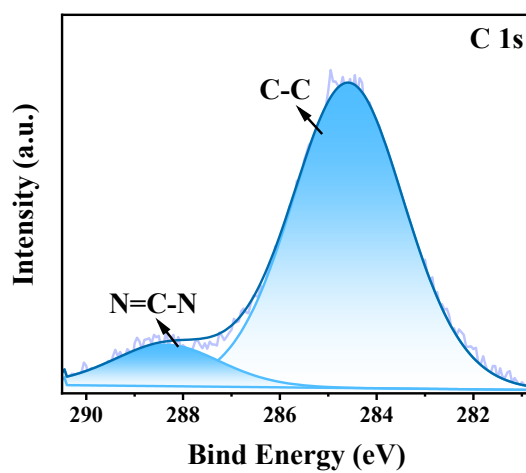

Fig. S5 High resolution XPS spectra for C 1s of Fe-W<sub>18</sub>O<sub>49</sub>/g-C<sub>3</sub>N<sub>5</sub>.

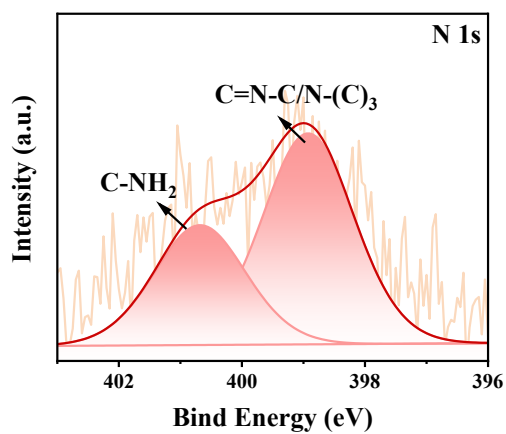

Fig. S6 High resolution XPS spectra for N 1s of Fe-W<sub>18</sub>O<sub>49</sub>/g-C<sub>3</sub>N<sub>5</sub>.

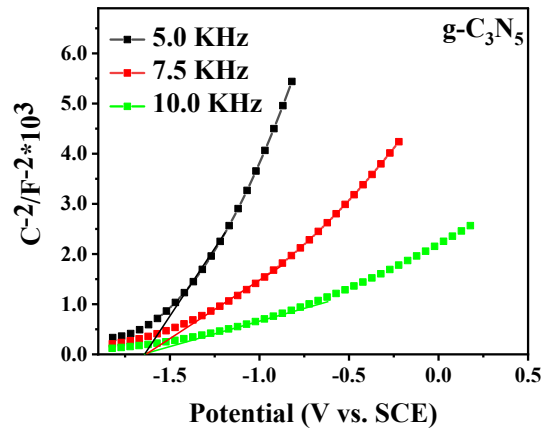

Fig. S7 Mott-Schottky curves of g-C<sub>3</sub>N<sub>5</sub>.

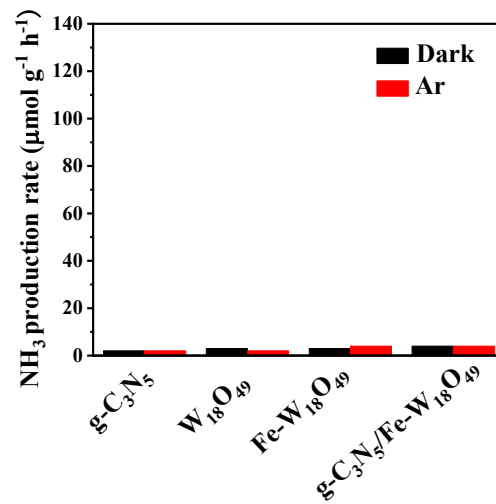

Fig. S8 NH<sub>3</sub> production rate of Fe-W<sub>18</sub>O<sub>49</sub>/g-C<sub>3</sub>N<sub>5</sub> in the environment of N<sub>2</sub> and Ar, without light illumination and under full spectra.

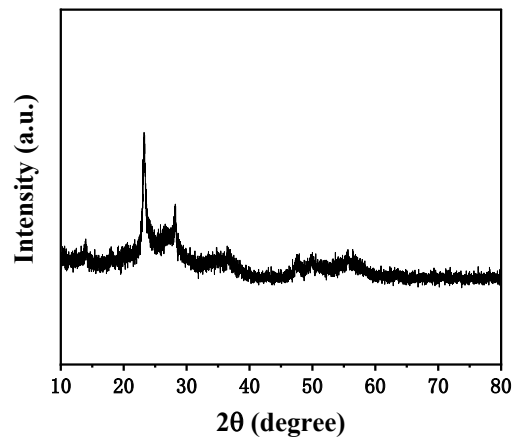

Fig. S9 XRD spectra of Fe-W<sub>18</sub>O<sub>49</sub>/g-C<sub>3</sub>N<sub>5</sub> after photocatalytic nitrogen fixation.

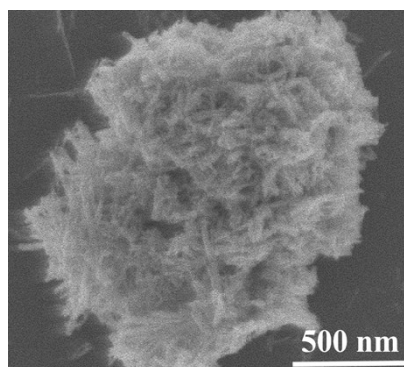

**Fig. S10** SEM image of Fe-W<sub>18</sub>O<sub>49</sub>/g-C<sub>3</sub>N<sub>5</sub> after photocatalytic nitrogen fixation.

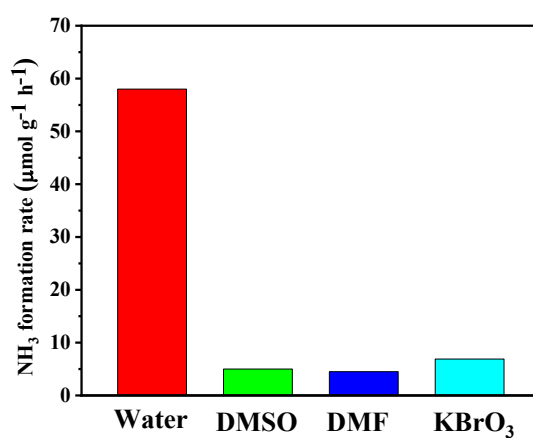

**Fig. S11** NH<sub>3</sub> production rate of the Fe-W<sub>18</sub>O<sub>49</sub>/g-C<sub>3</sub>N<sub>5</sub> in the existence of DMSO, DMF, and KBrO<sub>3</sub>.

**Table S1** Analysis consequence of element molar content in Fe-W<sub>18</sub>O<sub>49</sub>/g-C<sub>3</sub>N<sub>5</sub> through EDX.

| Element              | W     | O     | Fe   | C     | N     |
|----------------------|-------|-------|------|-------|-------|
| Molar percentage (%) | 16.63 | 51.10 | 0.86 | 18.96 | 12.45 |

**Table S2** The control experiments of NH<sub>3</sub> formation rate of Fe-W<sub>18</sub>O<sub>49</sub>/g-C<sub>3</sub>N<sub>5</sub> and Fe-W<sub>18</sub>O<sub>49</sub>&g-C<sub>3</sub>N<sub>5</sub>.

| Nanocomposite                   | Fe-W <sub>18</sub> O <sub>49</sub> /g-C <sub>3</sub> N <sub>5</sub> | Fe-W <sub>18</sub> O <sub>49</sub> &g-C <sub>3</sub> N <sub>5</sub> |
|---------------------------------|---------------------------------------------------------------------|---------------------------------------------------------------------|
| NH <sub>3</sub> production rate | 131.6 μmol g <sup>-1</sup> h <sup>-1</sup>                          | 86.3 μmol g <sup>-1</sup> h <sup>-1</sup>                           |
